# Supplementary material for: Study of CA-treated ZSM-22 zeolite with enhanced catalytic performance in the hydroisomerization of long-chain n-dodecane
Source: Royal Society of Chemistry journal article supplement (doi:10.1039/d0nj05190j), 2021-01-01
Supplement: d0nj05190j1.pdf [file d0nj05190j1.pdf]

## Supporting Information

### **Study of the CA-treated ZSM-22 zeolite with enhanced catalytic performance in the hydroisomerization of long-chain *n*-dodecane**

Liwen He, Wenqian Fu, Leyi Li, Yuxian Huang, Liyu Chen, Danni Wu, Lei Zhang\*, Tiandi Tang\*

Collaborative Innovation Center of Advanced Catalysis and Green Manufacturing, Jiangsu Key Laboratory of Advanced Catalytic Materials and Technology, School of Petrochemical Engineering, Changzhou University, Changzhou, Jiangsu 213164, P. R. China.

\* To whom correspondence should be addressed.

E-mail: [lqzhang2018@163.com](mailto:lqzhang2018@163.com); [tangtiandi@cczu.edu.cn](mailto:tangtiandi@cczu.edu.cn)\*

## **1. Preparation of Pt/HZSM-22 catalyst**

The parent ZSM-22 sample was treated by ion-exchange with 1.0 M  $\text{NH}_4\text{NO}_3$  solution twice at 80 °C for 4 h (20 mL/g sample), followed by drying at 100 °C overnight and then calcination at 500 °C for 4 h. Finally, the H-typed ZSM-22 sample was obtained, denoted as HZSM-22. Next, the Pt catalyst on HZSM-22 (Pt/HZSM-22) was prepared by the same method in the text, and the Pt loading was 0.5wt.%. After placing at room temperature and dried at 100 °C for 12 h, respectively, the Pt/HZSM-22 catalyst was shaped to 40-60 mesh, and further calcined at 450 °C for 3 h.

## 2. Figures

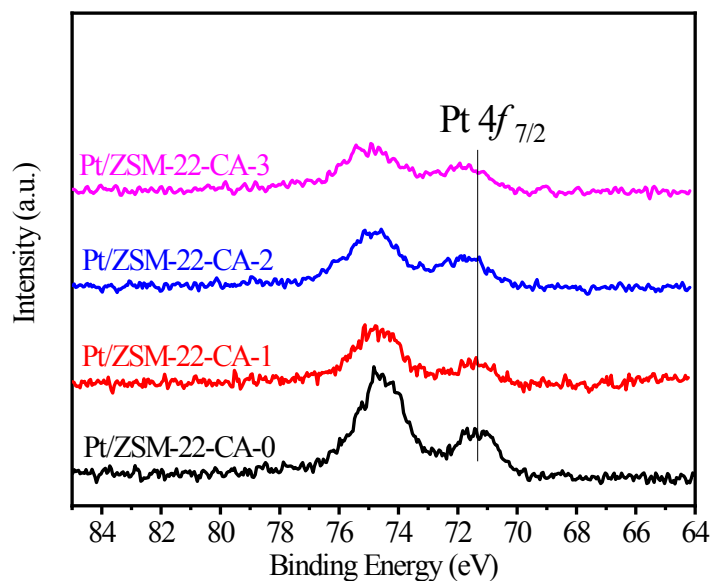

**Figure S1** Pt 4f XPS spectra of Pt/ZSM-22-CA-x (x=0-3) catalysts.

**Discussion:** Because the binding energy region of Pt 4f<sub>5/2</sub> and Al 2p were seriously overlapped, then the Pt 4f<sub>7/2</sub> was mainly referenced. Typically, the binding energy of the metallic Pt 4f<sub>7/2</sub> was 71.0 eV. While this value for the Pt 4f<sub>7/2</sub> on the series of Pt/CA-ZSM-22-x catalysts was in the range of 71.0-71.8 eV, demonstrating a shift to higher binding energy for the Pt 4f<sub>7/2</sub>. This phenomenon could be related to the change in the acidity of the CA-treated ZSM-22 zeolites. The close contact between the acidic sites and Pt clusters on the ZSM-22-based catalyst made the electron withdraw from the Pt atoms, leading to a higher binding energy of 71.8 eV for Pt 4f<sub>7/2</sub> on the Pt/ZSM-22-CA-3 catalyst.

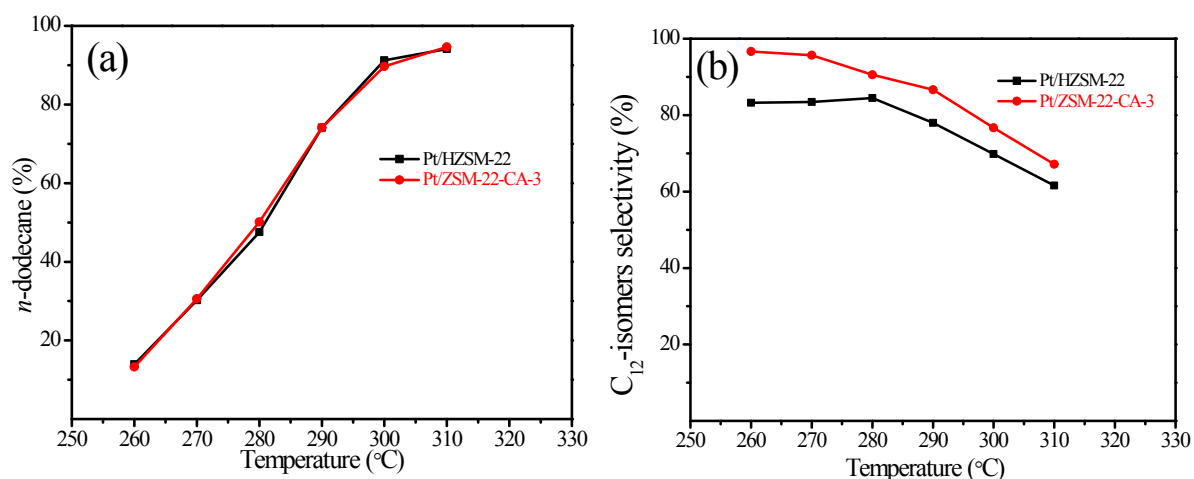

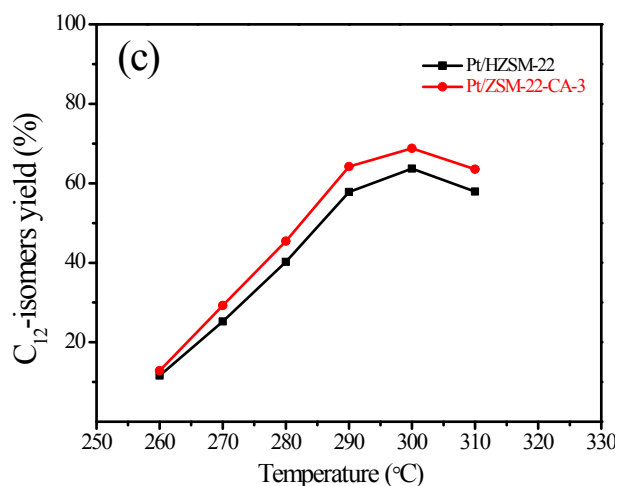

**Figure S2** The (a) *n*-dodecane conversion, (b) C<sub>12</sub>-isomers selectivity and (c) C<sub>12</sub>-isomers yield over Pt/HZSM-22 and Pt/ZSM-22-CA-3 catalysts as a function of temperature. (Reaction conditions: temperature of 260-310 °C, a total pressure of 2.0 MPa, a weight hourly space velocity of 2.3 h<sup>-1</sup>, and a hydrogen-to-*n*-dodecane volume ratio of 600)

**Discussion:** For comparison, the catalytic data for Pt/ZSM-22-CA-3 catalyst was also given in the same figure. Obviously, the Pt/HZSM-22 and Pt/ZSM-22-CA-3 catalysts exhibited similar *n*-dodecane conversion at the reaction temperature. But the Pt/ZSM-22-CA-3 catalyst had a better advantage than Pt/HZSM-22 in terms of the C<sub>12</sub>-isomers selectivity, and correspondingly, the Pt/ZSM-22-CA-3 catalyst showed higher yield of C<sub>12</sub>-isomers than Pt/HZSM-22 catalyst. For example, the Pt/ZSM-22-CA-3 catalyst had optimal C<sub>12</sub>-isomers yield of 68.8%, higher than Pt/HZSM-22 catalyst (63.7%). Considering the similar textural parameters for the two catalysts, the difference in isomers yields could be related to the acidity property of the catalysts, as discussed below.

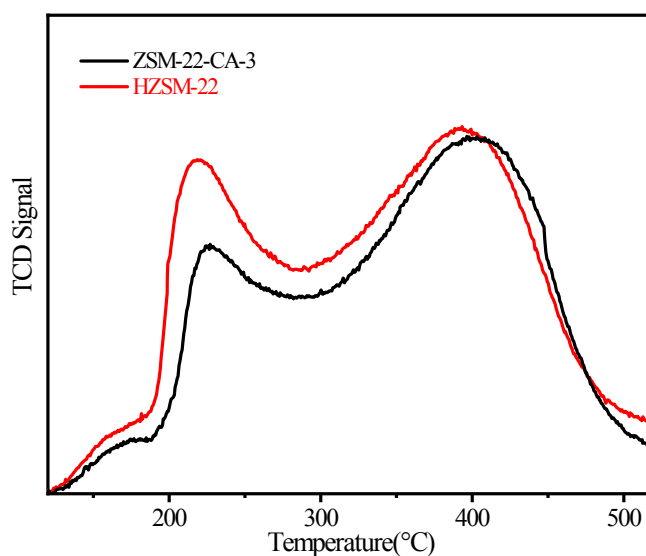

**Figure S3** the NH<sub>3</sub>-TPD result for ZSM-22-CA-3 and HZSM-22 samples.

**Discussion:** The desorbed peaks at temperature region of 150~200 °C, 200~300 °C, and 300~500 °C were assigned to the weak acidic sites, medium-strong acidic sites, and strong acidic sites, respectively[1]. As shown in **Figure S3**, the HZSM-22 sample had similar strong acidic sites to ZSM-22-CA-3 sample, but more medium-strong acidic sites than ZSM-22-CA-3 sample, which may lead to the further cracking of the C<sub>12</sub>-isomers.

#### Reference

[1] S. Liu, J. Ren, S. Zhu, H. Zhang, E. Lv, J. Xu, Y.-W. Li, Synthesis and characterization of the Fe-substituted ZSM-22 zeolite catalyst with high n-dodecane isomerization performance, *J. Catal.* 330 (2015) 485-496.
